# Supplementary material
Source: PubMed Central journal article supplement (PMC7978026)
Supplement: ryct190010suppa1.pdf [file ryct190010suppa1.pdf]

**Table E1: CMR Sequence Parameters**

| Parameter                                             | Short axis<br>SSFP Cine          | Short axis<br>black-blood<br>T2 STIR   | EGE                                    | Short axis<br>LGE                     | T1 Mapping                            | T2 Mapping                                 |
|-------------------------------------------------------|----------------------------------|----------------------------------------|----------------------------------------|---------------------------------------|---------------------------------------|--------------------------------------------|
| Field of view (mm)                                    | 350 × 350                        | 350 × 350                              | 290 × 290                              | 360 × 311                             | 300 × 300                             | 300 × 347                                  |
| TR (ms); TE (ms)                                      | 2.8; 1.38                        | 2 RR intervals;<br>70                  | 1 RR interval<br>14                    | 3.5; 1.71                             | 2.2; 1.02                             | 1 RR interval;<br>23.6/ΔTE =<br>11.8 (6Ec) |
| Flip angle (°)                                        | 60                               | 90                                     | 90                                     | 15                                    | 35                                    | 90                                         |
| Voxel size (mm) acquired;<br>reconstructed            | 1.79 × 2 × 8;<br>0.99 × 0.99 × 8 | 1.51 × 2.43 ×<br>8; 0.91 × 0.91<br>× 8 | 0.95 × 1.49 ×<br>8; 0.82 × 0.82<br>× 8 | 1.65 × 1.88 ×<br>10; 0.9 × 0.9 ×<br>5 | 1.97 × 2 × 10;<br>1.17 × 1.17 ×<br>10 | 1.97 × 2.03 ×<br>10; 1.03 × 1.03<br>× 10   |
| Parallel imaging (SENSE)                              | SENSE factor<br>3                | SENSE factor<br>2.5                    | No                                     | SENSE factor<br>2                     | SENSE factor<br>2                     | Yes, SENSE<br>factor 2                     |
| Scan duration (mm:ss)                                 | 01:24                            | 01:36                                  | 04:42                                  | 00:27                                 | 00:45                                 | 00:42                                      |
| Scan time/breath-hold (s)                             | 00:13                            | 00:08                                  | —                                      | 00:12                                 | 00:15                                 | 00:14                                      |
| Cardiac phases per RR<br>interval; shot duration (ms) | 40;—                             | —;134                                  | —;70                                   | —;151                                 | —;167                                 | —;83                                       |

SSFP = steady-state free precession, STIR = short-tau inversion recovery, EGE = early gadolinium enhancement, LGE = late gadolinium enhancement, TR = time of repetition, TE = time to echo, SENSE = sensitivity encoding, Ec = Echo.
